# Supplementary material for: Construction of superhydrophobic surfaces by fibrous aggregation of perfluoroalkyl chain-containing organogelators
Source: Royal Society of Chemistry journal article supplement (doi:10.1039/b601485b), 2006-01-01
Supplement: b601485b.pdf [file b601485b.pdf]

**Table S1** Contact angles on glass plates coated by xerogels

| Compound               | Solvent <sup>a</sup> | Contact angle <sup>b</sup> (°) |
|------------------------|----------------------|--------------------------------|
| <b>1</b>               | methanol             | 154                            |
|                        | ethanol              | 156                            |
|                        | 1-propanol           | 154                            |
|                        | ethyl acetate        | 151                            |
|                        | acetonitrile         | 152                            |
| 12-hydroxystearic acid | cyclohexane          | 90                             |
|                        | <i>n</i> -heptane    | 94                             |
|                        | toluene              | 90                             |

<sup>a</sup> The selected solvents are gelated by the compounds at the concentration of less than 20 g/L. <sup>b</sup> Average at five different points.
